# Supplementary material for: Carotid webs produce greater hemodynamic disturbances than atherosclerotic disease: a DSA time–density curve study
Source: PubMed Central journal article supplement — J Neurointerv Surg. 2021 Jul 27;14(7):729–33. doi: 10.1136/neurintsurg-2021-017588 (PMC9209666; doi:10.1136/neurintsurg-2021-017588), 2021-07-27
Supplement: neurintsurg-2021-017588supp001.pdf [file neurintsurg-2021-017588supp001.pdf]

## **SUPPLEMENTARY RESULTS**

### Comparison of Absolute Hemodynamic Parameters

Kruskal-Wallis group-level comparisons of absolute hemodynamic parameters in the common carotid artery (CCA) are summarized in Supplementary Table 1. There was significant overall difference in the absolute full width at half maximum (FWHM) ( $p=0.001$ ) among patient groups, while the remaining parameters showed no difference. Comparison of absolute hemodynamic parameters in the internal carotid artery (ICA) (Supplementary Table 2) showed no significant differences.

Pairwise comparisons of absolute FWHM, in the ICA and CCA, without with Holm correction for multiple comparisons are summarized in Supplementary Tables 3 and 4, respectively. Carotid web (CaW) and moderate atherosclerosis groups did not significantly differ in absolute FWHM in the CCA ( $p=0.29$  uncorrected,  $p=1$  corrected).

Supplementary Table 1 Comparison of Absolute CCA Parameters

| Parameter* | Normal (n= 8)    | Mild Atherosclerosis (n= 7) | Moderate Atherosclerosis (n= 6) | Severe Atherosclerosis (n=5) | Carotid Web (n=15) | p value**    |
|------------|------------------|-----------------------------|---------------------------------|------------------------------|--------------------|--------------|
|            | 2174.16          | 2400.79                     | 883.67                          | 1647.36                      | 1718.00            |              |
| AUC Total  | (3096.25)        | (3314.63)                   | (3673.77)                       | (1792.66)                    | (2846.22)          | 0.911        |
|            |                  | 1298.35                     | 401.45                          | 1003.46                      | 498.30             |              |
| AUC WI     | 841.92 (2141.82) | (2161.15)                   | (2734.98)                       | (1083.22)                    | (1154.39)          | 0.570        |
|            | 1280.02          | 763.41                      | 576.72                          | 836.58                       | 1220.53            |              |
| AUC WO     | (1344.38)        | (1689.79)                   | (1284.85)                       | (1551.80)                    | (1370.07)          | 0.987        |
| FWHM       | 2.52 (1.01)      | 2.50 (0.67)                 | 1.90 (0.34)                     | 2.70 (1.17)                  | 1.36 (0.81)        | <b>0.001</b> |
| TTP        | 2.25 (1.38)      | 2.00 (0.88)                 | 1.50 (0.50)                     | 1.75 (1.25)                  | 1.50 (1.00)        | 0.093        |
|            |                  | 1042.15                     | 458.90                          | 758.18                       | 797.50             |              |
| MS         | 561.50 (817.51)  | (1680.20)                   | (2024.86)                       | (2027.84)                    | (2093.98)          | 0.908        |

\*All hemodynamic parameters are reported as median (interquartile range)

\*\*p-values: Kruskal-Wallis Test

AUC: area under the curve; WI: wash in; WO: wash out; FWHM: full width at half maximum; TTP: time to peak; MS: maximum slope during wash in

Supplementary Table 2 Comparison of Absolute ICA Parameters

| Parameter* | Normal (n= 8)    | Mild Atherosclerosis (n= 7) | Moderate Atherosclerosis (n= 6) | Severe Atherosclerosis (n=5) | Carotid Web (n=15) | p value** |
|------------|------------------|-----------------------------|---------------------------------|------------------------------|--------------------|-----------|
|            | 2135.28          | 2052.59                     | 1136.67                         | 1776.06                      | 2361.60            |           |
| AUC Total  | (3950.23)        | (3657.38)                   | (3491.17)                       | (1707.27)                    | (3840.50)          | 0.901     |
|            |                  | 959.95                      | 552.48                          | 738.76                       | 803.90             |           |
| AUC WI     | 966.48 (2067.10) | (1035.40)                   | (1216.27)                       | (771.96)                     | (1206.20)          | 0.926     |
|            | 1381.83          | 1038.07                     | 584.20                          | 697.59                       | 1587.80            |           |
| AUC WO     | (1753.61)        | (2035.98)                   | (2227.34)                       | (1346.50)                    | (2626.00)          | 0.665     |
| FWHM       | 2.75 (0.83)      | 2.49 (0.35)                 | 1.91 (0.50)                     | 2.81 (1.34)                  | 2.30 (1.14)        | 0.080     |
| TTP        | 2.00 (1.50)      | 2.00 (0.88)                 | 2.00 (1.00)                     | 2.00 (1.25)                  | 1.50 (1.50)        | 0.725     |
|            |                  | 701.86                      | 547.14                          | 566.22                       | 597.90             |           |
| MS         | 559.43 (1045.95) | (1789.24)                   | (2768.95)                       | (1642.18)                    | (2524.00)          | 0.720     |

\*All hemodynamic parameters are reported as median (interquartile range)

\*\*p-values: Kruskal-Wallis Test

AUC: area under the curve; WI: wash in; WO: wash out; FWHM: full width at half maximum; TTP: time to peak;

MS: maximum slope during wash in

Supplementary Table 3 Pairwise Comparisons of Absolute FWHM in the ICA

## a) Uncorrected p-values

|          | Mild  | Moderate | Normal | Severe |
|----------|-------|----------|--------|--------|
| Moderate | 0.149 | -        | -      | -      |
| Normal   | 0.713 | 0.075    | -      | -      |
| Severe   | 0.495 | 0.043    | 0.743  | -      |
| Web      | 0.468 | 0.325    | 0.251  | 0.143  |

## b) Using Holm Correction

|          | Mild | Moderate | Normal | Severe |
|----------|------|----------|--------|--------|
| Moderate | 1.00 | -        | -      | -      |
| Normal   | 1.00 | 0.67     | -      | -      |
| Severe   | 1.00 | 0.43     | 1.00   | -      |
| Web      | 1.00 | 1.00     | 1.00   | 1.00   |

Supplementary Table 4 Pairwise Comparisons of Absolute FWHM in the CCA

## a) Uncorrected p-values

|          | Mild  | Moderate | Normal | Severe |
|----------|-------|----------|--------|--------|
| Moderate | 0.043 | -        | -      | -      |
| Normal   | 0.708 | 0.019    | -      | -      |
| Severe   | 0.778 | 0.027    | 0.937  | -      |
| Web      | 0.001 | 0.288    | <0.001 | <0.001 |

## b) Using Holm Correction

|          | Mild  | Moderate | Normal | Severe |
|----------|-------|----------|--------|--------|
| Moderate | 0.217 | -        | -      | -      |
| Normal   | 1.00  | 0.131    | -      | -      |
| Severe   | 1.00  | 0.162    | 1.00   | -      |
| Web      | 0.006 | 1.00     | 0.002  | 0.004  |
